# Supplementary material for: Novel salts of the antiemetic drug domperidone: synthesis, characterization and physicochemical property investigation
Source: Royal Society of Chemistry journal article supplement (doi:10.1039/d2ce00902a), 2022-12-12
Supplement: d2ce00902a1.pdf [file d2ce00902a1.pdf]

## SUPPORTING INFORMATION

### Novel salts of the antiemetic drug- Domperidone: Synthesis, characterization and physicochemical property investigation

Smruti Rekha Rout,<sup>a</sup> Gowtham Kenguva,<sup>a</sup> Lopamudra Giri <sup>a</sup> and Rambabu Dandela<sup>\*a</sup>

<sup>a</sup>Department of Industrial and Engineering Chemistry, Institute of Chemical Technology-  
Indian Oil Bhubaneswar Campus, Bhubaneswar, India. E-mail:

[r.dandela@iocb.ictmumbai.edu.in](mailto:r.dandela@iocb.ictmumbai.edu.in)

| Contents                                                                                                                                                                                                          | Page No.  |
|-------------------------------------------------------------------------------------------------------------------------------------------------------------------------------------------------------------------|-----------|
| <b>Figure S1:</b> ORTEP view of (a) DOM.OA, (b) DOM.MA, (c) DOM.SA, (d) DOM.FA, (e) DOM.AA, (f) DOM.CA, (g) DOM.4-HBA, (h) DOM.2,4-DHBA and (i) DOM.PCA. Herein, the ellipsoids are drawn with a 50% probability. | S2        |
| <b>Table S1:</b> Hydrogen bond distances (Å) and angles (°) of molecular salts of DOM.                                                                                                                            | S2-S3     |
| <b>Table S2.</b> Torsion angles corresponding to DOM molecular salt.                                                                                                                                              | S4        |
| <b>Figure S2:</b> Thermogravimetric (TG) derivative profile of (a) DOM.OA, (b) DOM.MA, (c) DOM.SA, (d) DOM.FA, (e) DOM.AA, (f) DOM.CA, (g) DOM.4-HBA, (h) DOM.2,4-DHBA and (i) DOM.PCA.                           | S4        |
| <b>Table S3.</b> Details of temperature range and corresponding TGA weight loss of DOM salts.                                                                                                                     | S5-S6     |
| <b>Figure S3:</b> HS 3D maps and 2D fingerprints, the total % of the contacts population involve of DOM and its molecular salts.                                                                                  | S6-S8     |
| <b>Details procedure for DOM.MAL salt preparation</b>                                                                                                                                                             | <b>S8</b> |
| <b>Figure S4:</b> UV absorbance spectra of DOM and its molecular salts at various pH showed the negligible interference in the UV region of 284 nm, where the drug is absorbed.                                   | S9-S11    |
| Details of the solubility parameters of DOM molecular salts                                                                                                                                                       | S11-S14   |
| <b>Table S4:</b> A comparison of the solubility rate of synthesized molecular solids with respective salt former.                                                                                                 | S14       |
| <b>Figure S5:</b> Thermogravimetric (TG) profile of (a) DOM.OA, (b) DOM.MA, (c) DOM.SA, (d) DOM.FA, (e) DOM.AA, (f) DOM.CA, (g) DOM.4-HBA, (h) DOM.2,4-DHBA and (i) DOM.PCA after solubility                      | S15       |

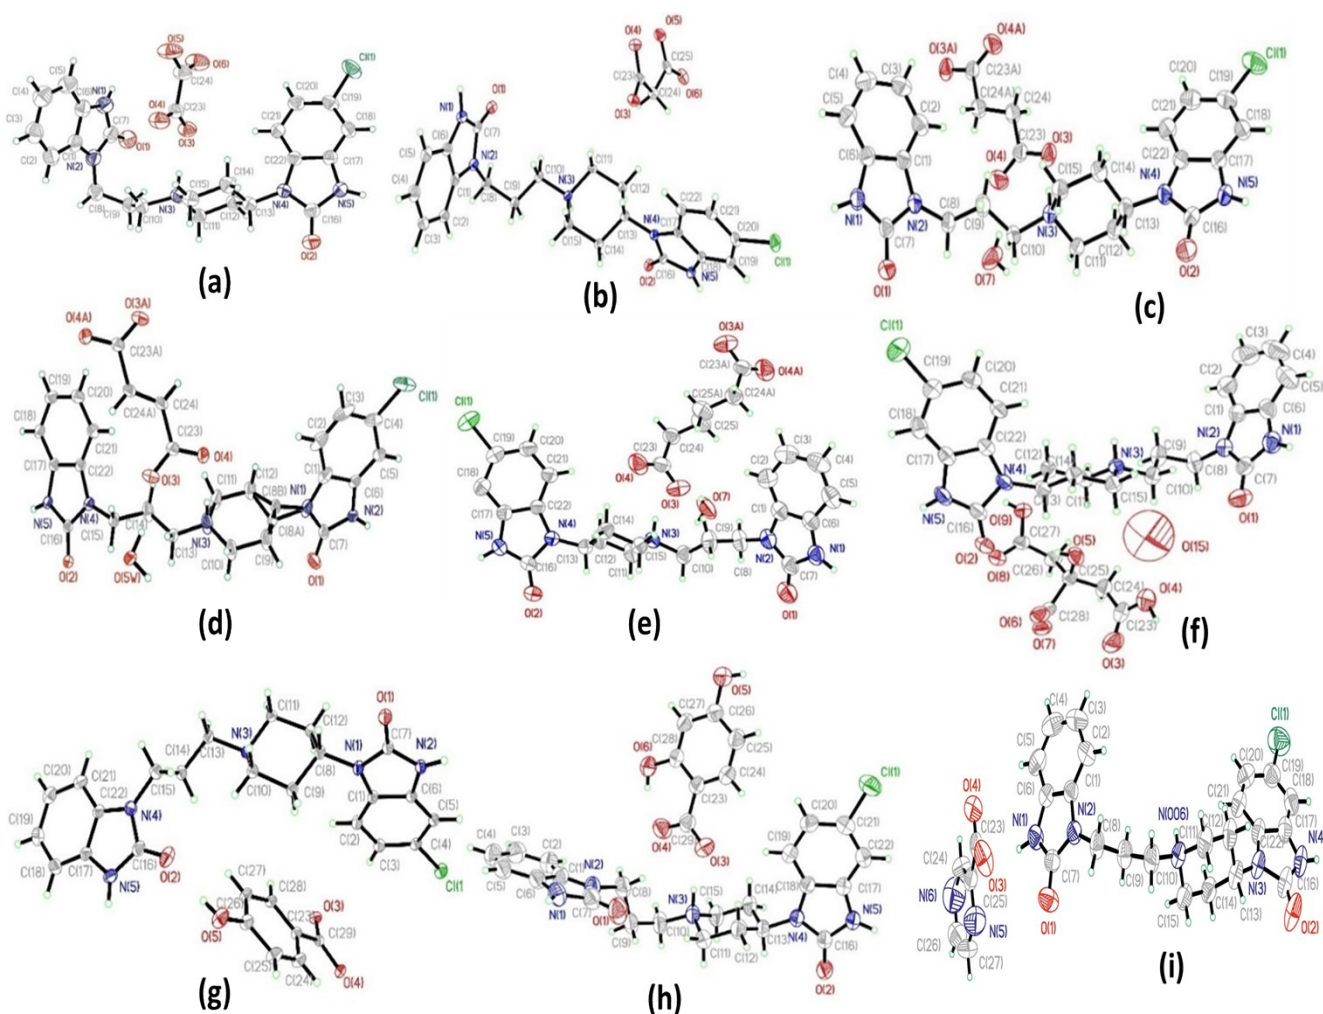

**Figure S1:** ORTEP view of (a) DOM.OXA, (b) DOM.MAL, (c) DOM.SUA, (d) DOM.FA, (e) DOM.AA, (f) DOM.CA, (g) DOM.4-HBA, (h) DOM.2,4-DHBA and (i) DOM.PCA. Herein, the ellipsoids are drawn with a 50% probability.

**Table S1.** Hydrogen bond distances (Å) and angles (°) of molecular salts of DOM.

| Solid forms    | $D-H\cdots A$          | $D-H(\text{Å})$ | $H\cdots A(\text{Å})$ | $D-A(\text{Å})$ | $D-H\cdots A(^{\circ})$ |
|----------------|------------------------|-----------------|-----------------------|-----------------|-------------------------|
| <b>DOM.OXA</b> | $N3^+-H112\cdots O3^-$ | 0.921           | 1.86                  | 2.771(1)        | 170                     |
|                | $N3-H112\cdots O4$     | 0.921           | 2.64                  | 3.232(1)        | 122                     |
|                | $N5-H113\cdots O6$     | 0.901           | 2.12                  | 2.922(2)        | 146                     |
|                | $N1-H111\cdots O1$     | 0.780           | 2.01                  | 2.790(1)        | 173                     |
|                | $N5-H113\cdots O3^-$   | 0.901           | 2.32                  | 3.029(1)        | 135                     |
|                | $C15-H15A\cdots O2$    | 0.970           | 2.40                  | 3.237(1)        | 143                     |
| <b>DOM.MAL</b> | $N3^+-H111\cdots O3^-$ | 1.022           | 1.69                  | 2.710(1)        | 174                     |
|                | $N5-H112\cdots O2$     | 0.862           | 1.88                  | 2.741(1)        | 172                     |
|                | $N1-H113\cdots O3$     | 0.990           | 1.83                  | 2.792(1)        | 163                     |
|                | $N3-H111\cdots O4$     | 1.021           | 2.43                  | 3.101(1)        | 123                     |

|                                      |                                         |             |       |          |          |
|--------------------------------------|-----------------------------------------|-------------|-------|----------|----------|
|                                      | C15–H15B…O6                             | 0.991       | 2.53  | 3.392(1) | 145      |
|                                      | C15–H15B…O5                             | 0.991       | 2.60  | 3.353(1) | 148      |
| <b>DOM.SUA</b>                       | C15–H15A…O2                             | 0.971       | 2.25  | 3.161(1) | 156      |
|                                      | N3 <sup>+</sup> –H100…O3 <sup>-</sup>   | 1.019       | 1.69  | 2.712(1) | 179      |
|                                      | O1–H104…O7                              | 0.730       | 1.93  | 2.772(2) | 168      |
|                                      | O7–H103…O4                              | 0.810       | 1.97  | 2.710(1) | 150      |
|                                      | N5–H102…O7                              | 0.801       | 2.05  | 2.710(1) | 165      |
|                                      | N1–H101…O3                              | 0.870       | 1.95  | 2.819(1) | 166      |
|                                      | <b>DOM.FA</b>                           | C11–H11B…O1 | 0.970 | 2.44     | 3.174(3) |
| N3 <sup>+</sup> –H3A…O4 <sup>-</sup> |                                         | 0.981       | 1.98  | 2.964(1) | 174      |
| N2–H2A…O5W                           |                                         | 0.860       | 1.89  | 2.724(1) | 161      |
| N5–H5A…O4                            |                                         | 0.861       | 1.97  | 2.773(1) | 153      |
| O5W–H5WA…O3                          |                                         | 0.902       | 1.81  | 2.696(2) | 163      |
| O5W–H5WB…O2                          |                                         | 0.898       | 1.87  | 2.761(1) | 168      |
| <b>DOM.4-HBA</b>                     | N5–H5A…O4                               | 0.860       | 1.85  | 2.701(1) | 169      |
|                                      | N2–H2A…O4                               | 0.860       | 1.90  | 2.731(2) | 163      |
|                                      | O2–H5B…O5                               | 0.820       | 1.86  | 2.672(1) | 172      |
|                                      | N3 <sup>+</sup> –H3A…O3 <sup>-</sup>    | 0.980       | 1.69  | 2.670(1) | 170      |
| <b>DOM.2,4-DHBA</b>                  | N5–H5A…O6                               | 0.881       | 1.90  | 2.781(1) | 176      |
|                                      | N3 <sup>+</sup> –H100…O3 <sup>-</sup>   | 0.987       | 1.68  | 2.642(1) | 164      |
|                                      | O5–H5…O1                                | 0.820       | 1.88  | 2.673(3) | 162      |
|                                      | C14–H14A…O3                             | 0.970       | 2.51  | 3.191(2) | 127      |
|                                      | C8–H8B…O4                               | 0.969       | 2.47  | 3.091(1) | 121      |
| <b>DOM.CA</b>                        | C10–H10A…O15                            | 0.970       | 2.30  | 3.071(1) | 136      |
|                                      | C15–H15B…O1                             | 0.970       | 2.41  | 3.311(1) | 145      |
|                                      | C11–H11A…O1                             | 0.970       | 2.48  | 3.323(1) | 145      |
|                                      | O4–H4…O1                                | 0.830       | 1.57  | 2.601(1) | 173      |
|                                      | O9–H9…O6                                | 0.820       | 1.78  | 2.582(1) | 167      |
|                                      | O5–H5…O8                                | 0.820       | 1.96  | 2.761(1) | 167      |
|                                      | N3 <sup>+</sup> –H100…O3 <sup>-</sup>   | 0.910       | 1.80  | 2.692(1) | 168      |
| <b>DOM.PCA</b>                       | N4–H102…O3                              | 0.948       | 1.83  | 2.761(1) | 165      |
|                                      | N4–H103…O4                              | 0.765       | 2.44  | 3.072(1) | 140      |
|                                      | N4–H103…O3                              | 0.765       | 2.47  | 3.101(1) | 140      |
|                                      | N006 <sup>+</sup> –H101…O4 <sup>-</sup> | 0.959       | 1.88  | 2.772(1) | 153      |

**Table S2.** Torsion angles corresponding to DOM molecular salt.

| crystal forms | torsion angles (°) |             |             |              |             |              |             |
|---------------|--------------------|-------------|-------------|--------------|-------------|--------------|-------------|
|               | C1-N1-C2-C3        | C1-N1-C2-C9 | C3-C4-N2-C5 | C9-C10-N2-C5 | C4-N2-C5-C6 | C10-N2-C5-C6 | C8-N3-C7-C6 |
| DOM.OA        | 62.47              | -63.10      | -155.21     | 175.26       | -53.42      | -177.60      | -113.91     |
| DOM.MA        | -123.37            | 112.71      | 177.81      | -176.48      | -64.00      | 171.48       | -80.52      |
| DOM.SA        | -53.38             | 73.44       | 174.83      | -177.31      | 50.50       | 176.06       | 67.47       |
| DOM.FA        | 100.05             | -127.66     | -176.70     | 178.44       | -20.73      | -178.21      | -93.57      |
| DOM.AA        | 45.81              | -84.63      |             |              |             |              |             |
| DOM.AA        | 53.25              | -72.09      | -177.97     | 179.42       | -29.99      | -154.57      | -88.79      |
| DOM.CA        | -61.65             | 62.58       | 179.64      | 155.89       | 86.25       | -171.34      | -64.93      |
| DOM.4HBA      | -61.14             | 63.50       | -176.03     | 175.76       | 173.51      | -63.18       | -82.86      |
| DOM.2,4-DHBA  | -58.55             | 66.02       | 179.84      | 176.38       | 56.59       | 178.91       | -101.93     |
| DOM.PCA       | -56.91             | 67.52       | -173.58     | 175.96       | 159.43      | -76.76       | -77.83      |

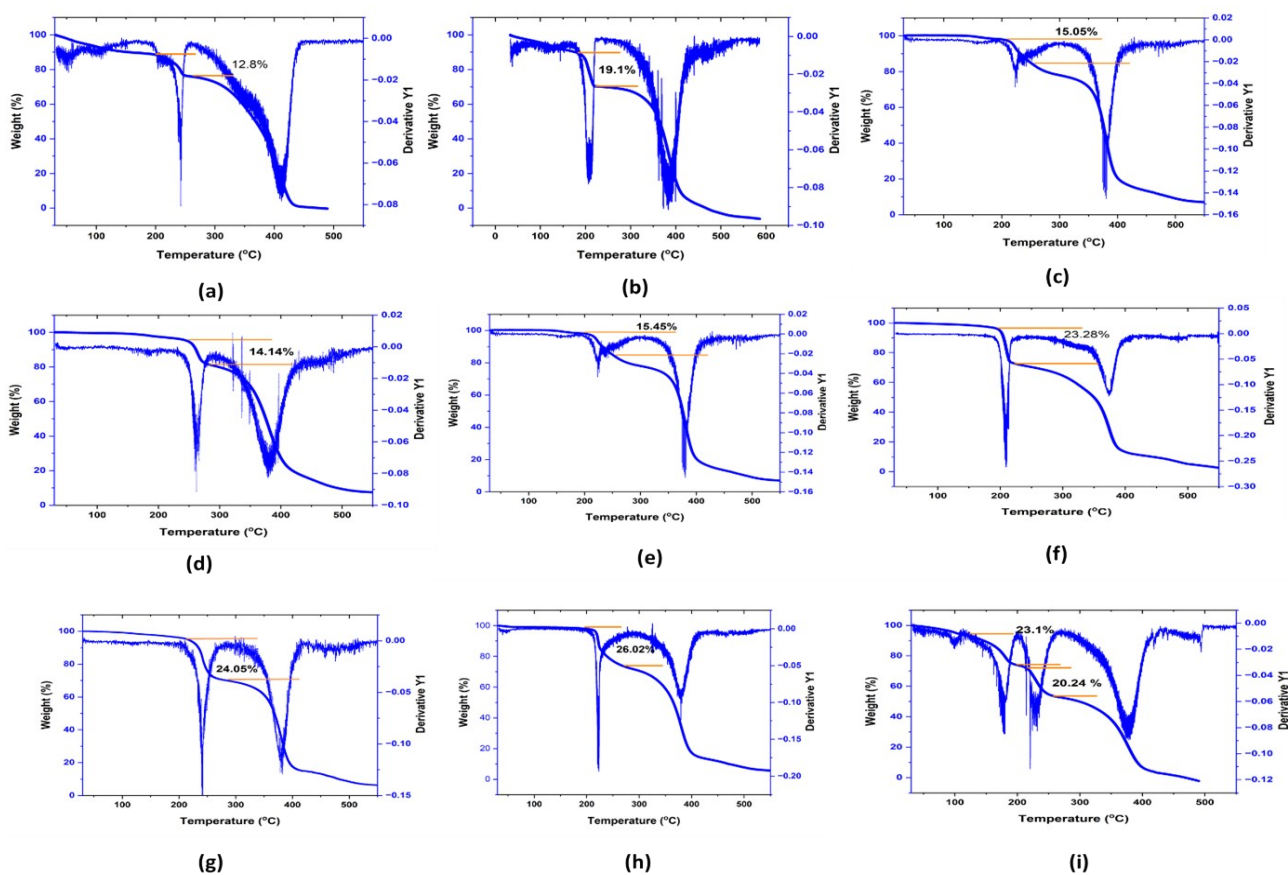

**Figure S2:** Thermogravimetric (TG) derivative profile of (a) DOM.OA, (b) DOM.MA, (c) DOM.SA, (d) DOM.FA, (e) DOM.AA, (f) DOM.CA, (g) DOM.4-HBA, (h) DOM.2,4-DHBA and (i) DOM.PCA.

**Table S3.** Details of temperature range and corresponding TGA weight loss of DOM salts.

| Compounds Name | Temperature Range (°C) | Percentage of weight loss (%) | Inference                                                                                                   |
|----------------|------------------------|-------------------------------|-------------------------------------------------------------------------------------------------------------|
| DOM.OA         | 200-264                | 12.8                          | Possible weight loss from decomposition of OA (Theoretical weight loss = 17.48 %)                           |
| DOM.MA         | 185-226                | 19.01                         | Possible weight loss from decomposition of MA (Theoretical weight loss = 19.78 %)                           |
| DOM.SA         | 197-255                | 15.05                         | Possible combine weight loss from lattice water and decomposition of SA (Theoretical weight loss = 15.31 %) |
| DOM.FA         | 246-283                | 14.14                         | Possible combine weight loss from lattice water and decomposition of FA (Theoretical weight loss = 15.14 %) |
| DOM.AA         | 196-253                | 15.45                         | Possible weight loss from decomposition of AA (Theoretical weight loss = 14.16 %)                           |
| DOM.CA         | 195-221                | 23.28                         | No significant weight loss (Possible decomposition of solid forms)                                          |
| DOM.4-HBA      | 212-298                | 24.05                         | Possible weight loss from                                                                                   |

|              |         |       |                                                                                            |
|--------------|---------|-------|--------------------------------------------------------------------------------------------|
|              |         |       | decomposition of 4-HBA<br>(Theoretical weight loss = 24.48 %)                              |
| DOM.2,4-DHBA | 198-273 | 26.02 | Possible weight loss from decomposition of 2,4-DHBA<br>(Theoretical weight loss = 28.98 %) |
| DOM.PCA      | 120-198 | 23.01 | Possible weight loss from decomposition of PCA (Theoretical weight loss = 22.56 %)         |

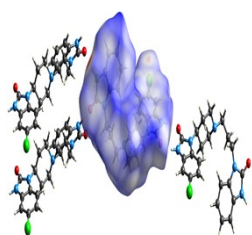

DOM

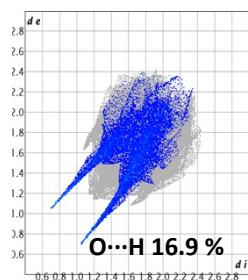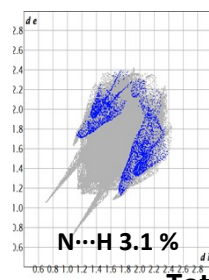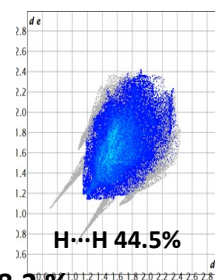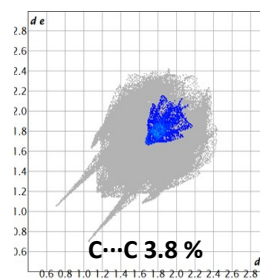

Total 68.3 %

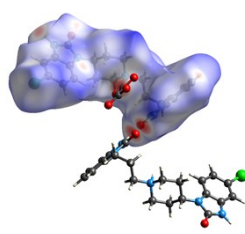

DOM.OA

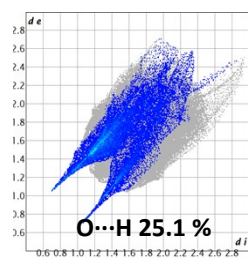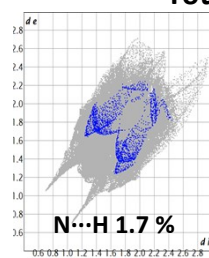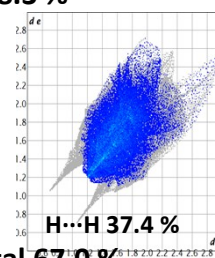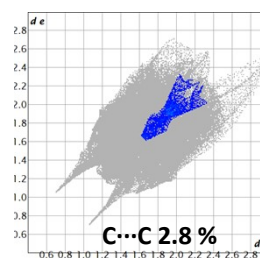

Total 67.0 %

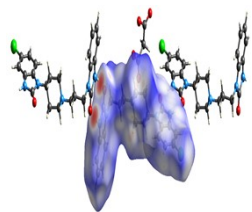

DOM.MA

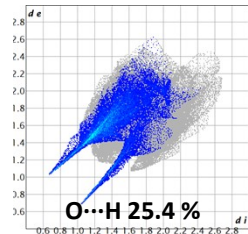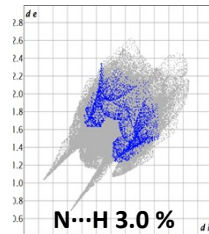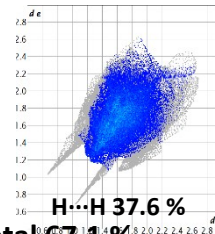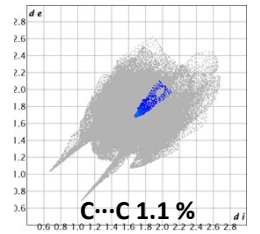

Total 67.1 %



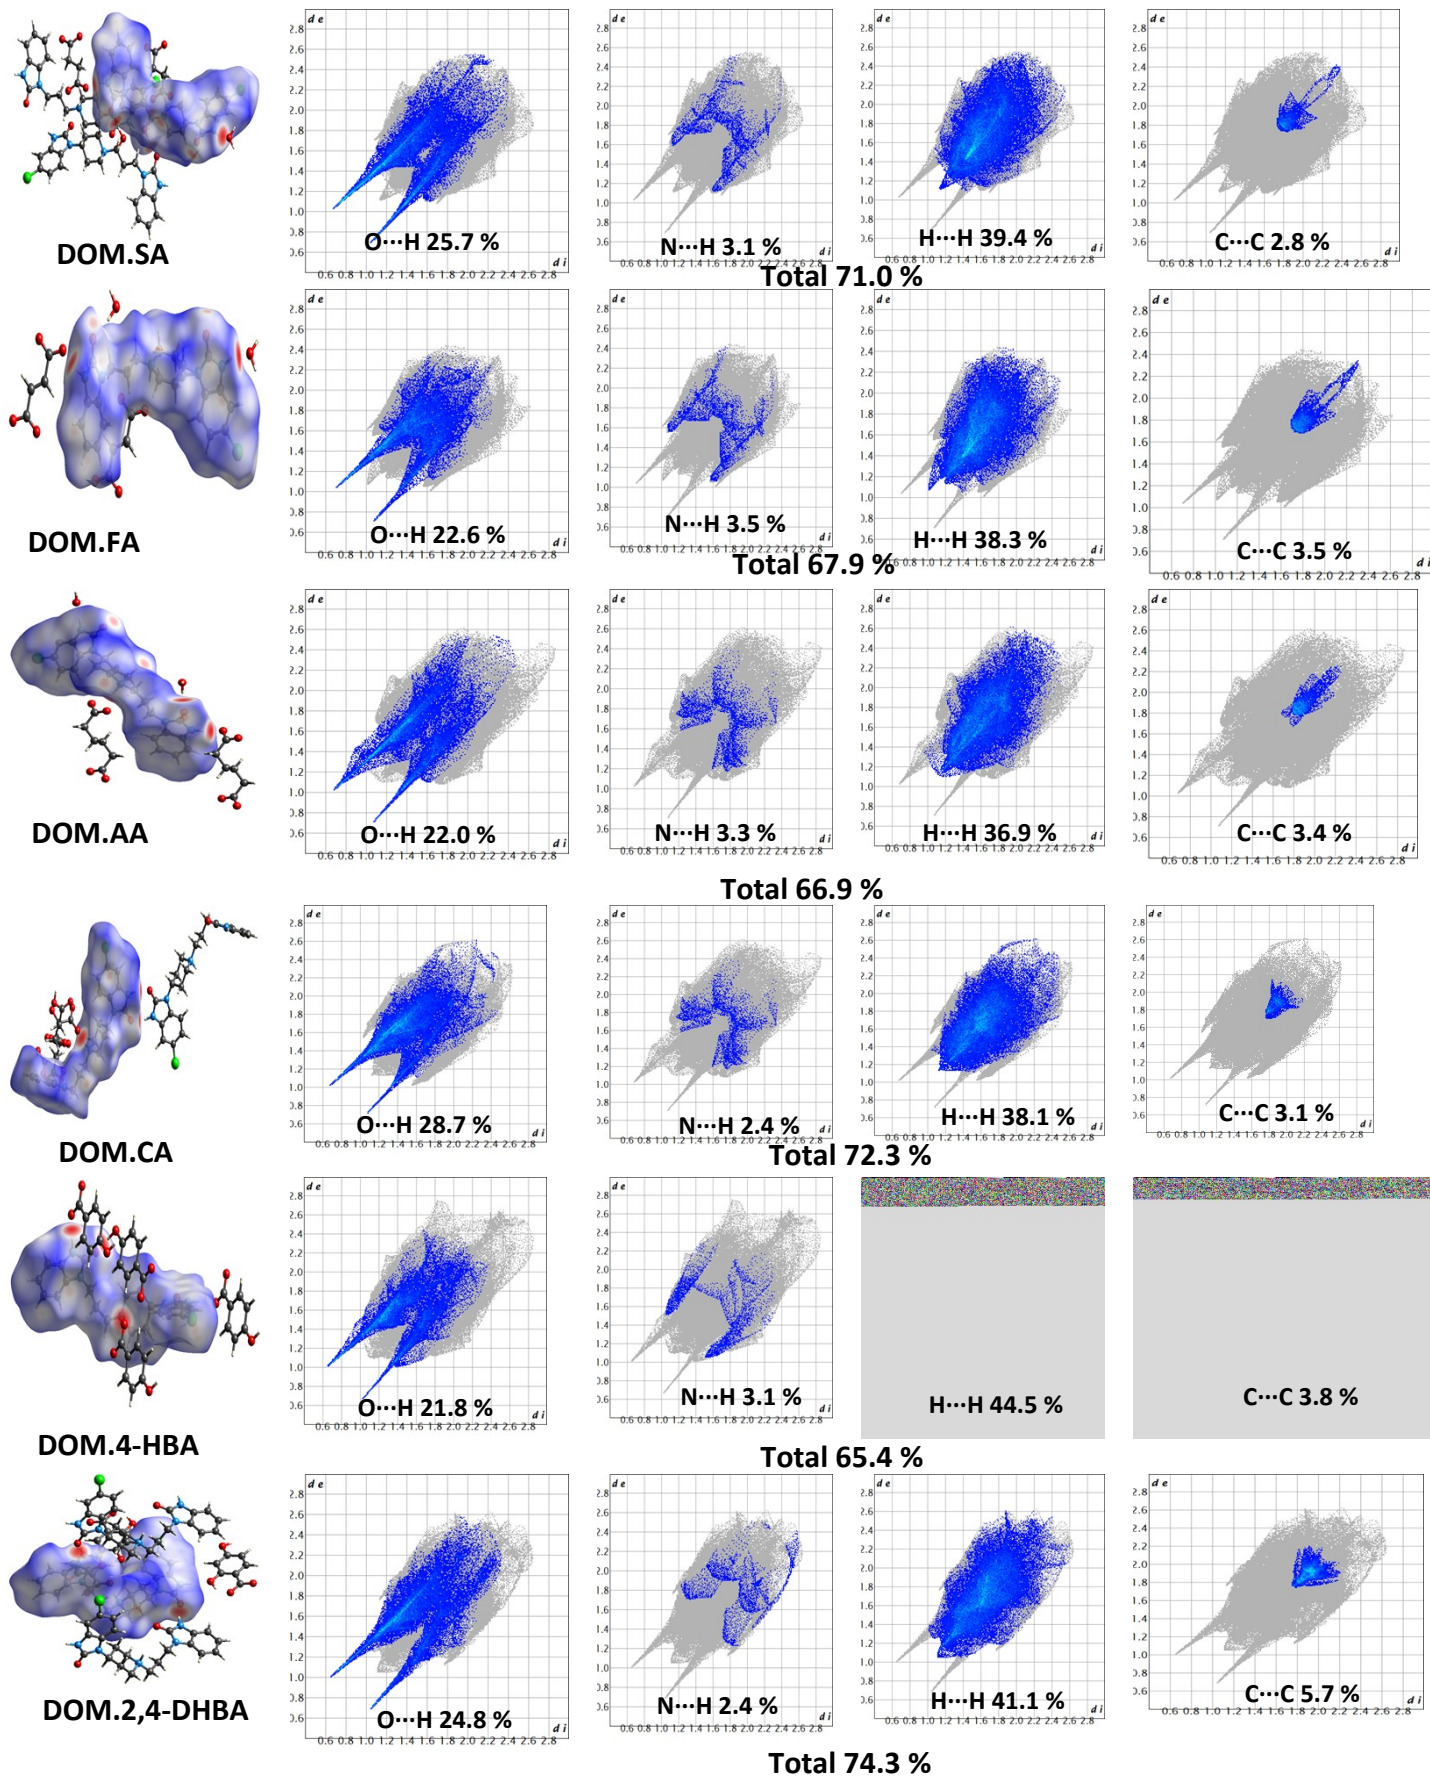

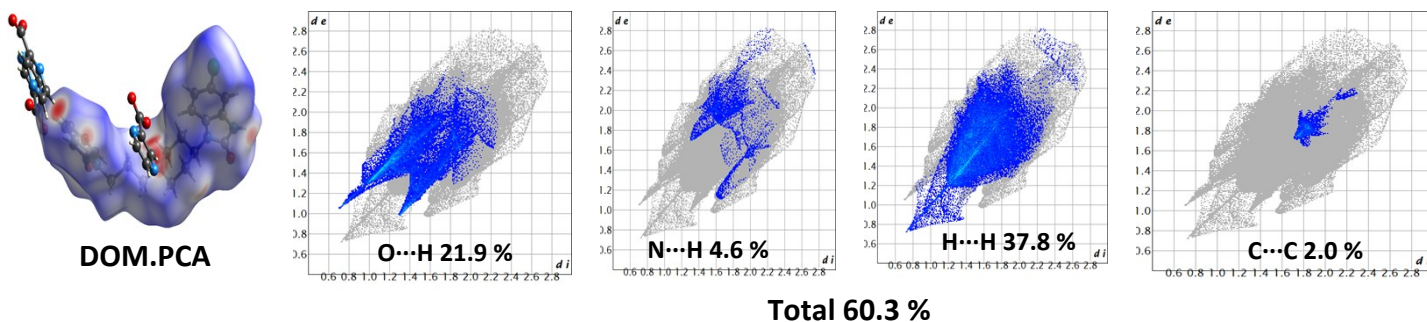

**Figure S3.** HS 3D maps and 2D fingerprints, the total % of the contacts population involve of DOM and its molecular salts.

**Details procedure for DOM.MAL salt preparation.**

DOM (42.59 mg, 0.1 mmol) and an equivalent amount of MAL were crushed in a mortar pestle for around 30 minutes in the presence of 2-3 drops of methanol as liquid, yielding the relevant micro solid forms. Which is further validated by matching the experimental PXRD pattern with the earlier reported simulated data.<sup>1</sup>

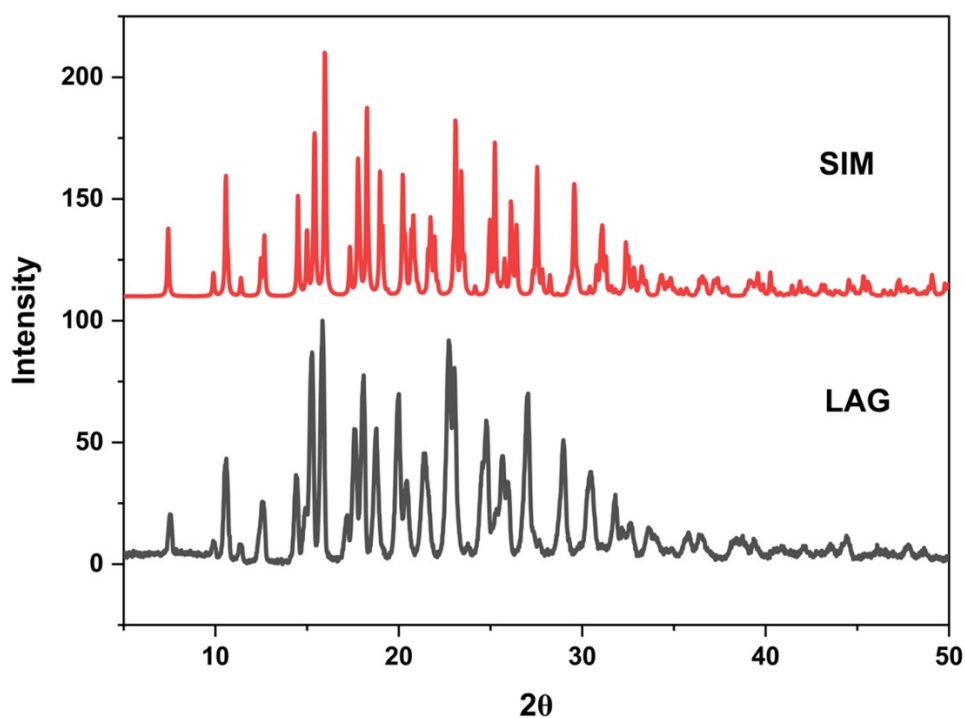

PXRD of 1:1 DOM.MAL ground mixture compared with the simulated pattern



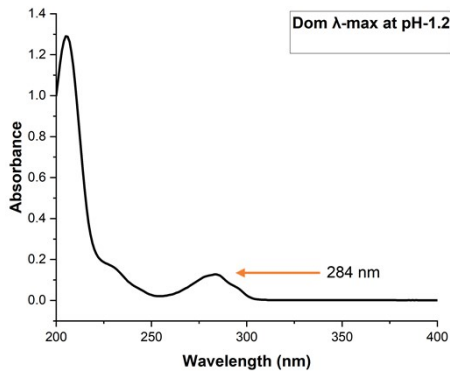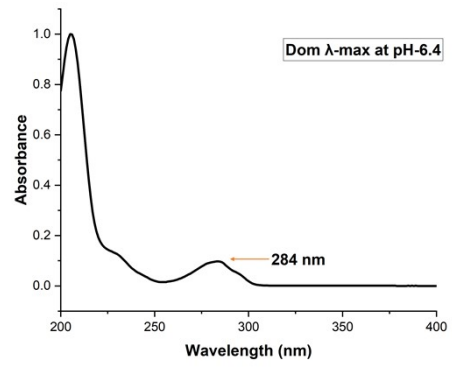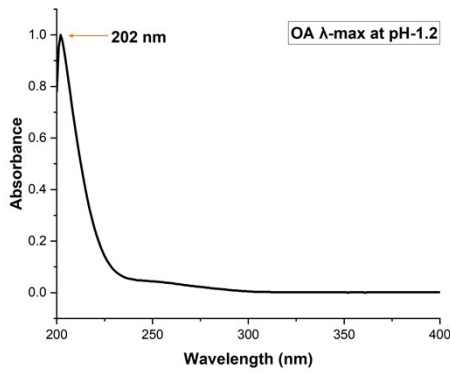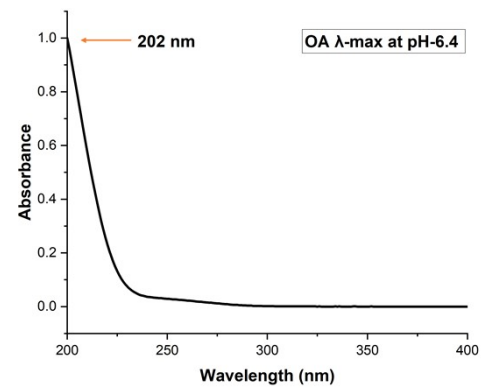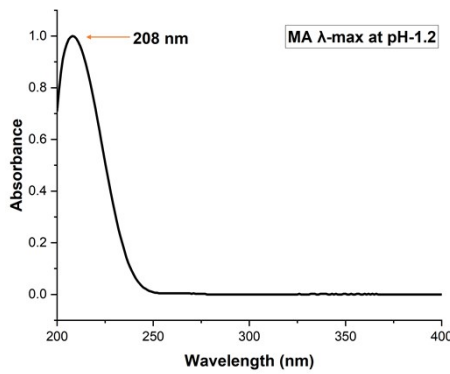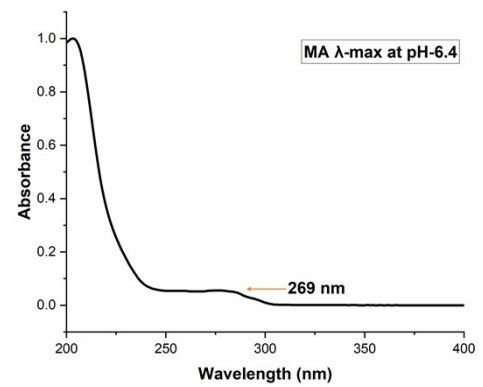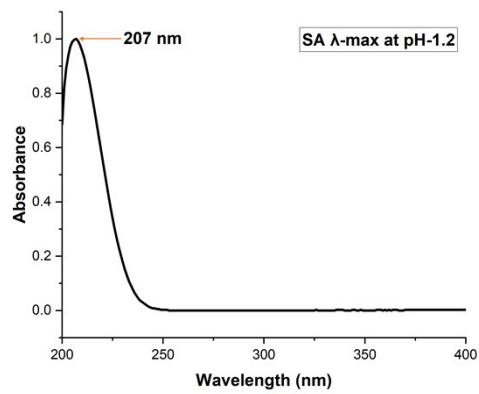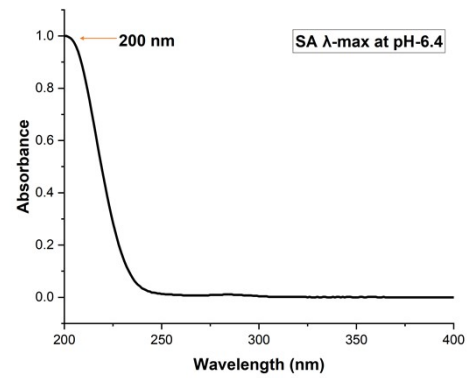

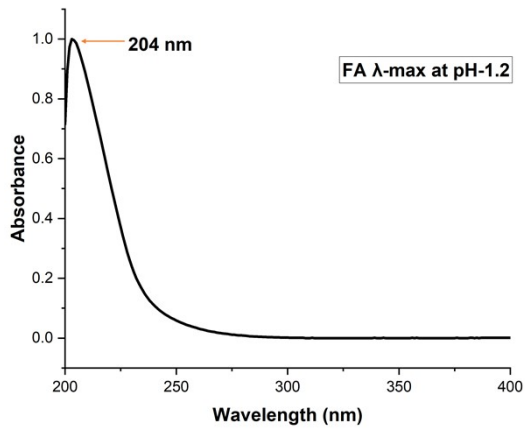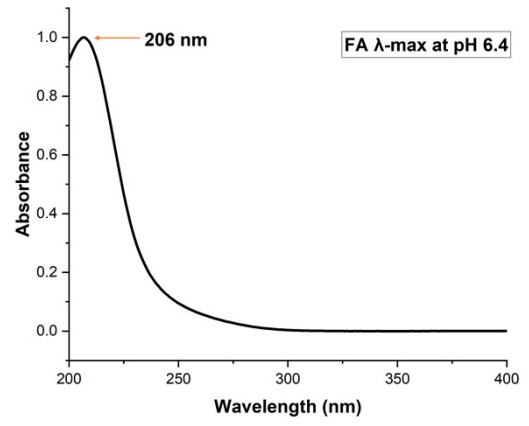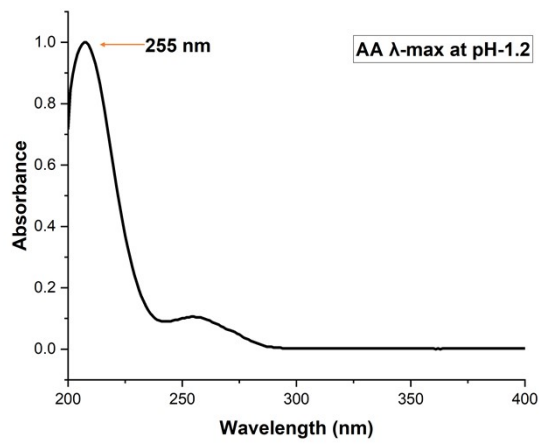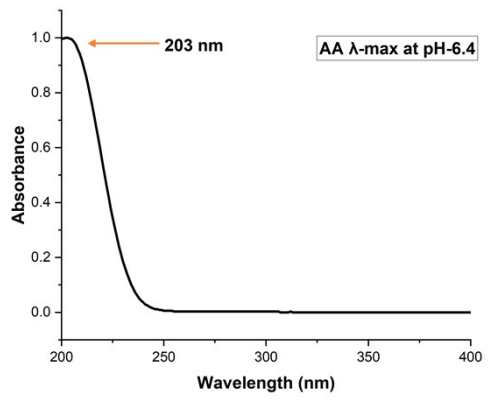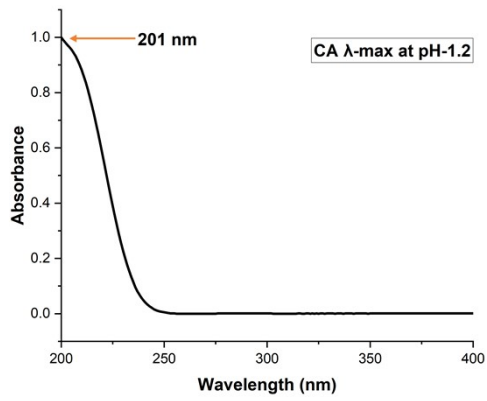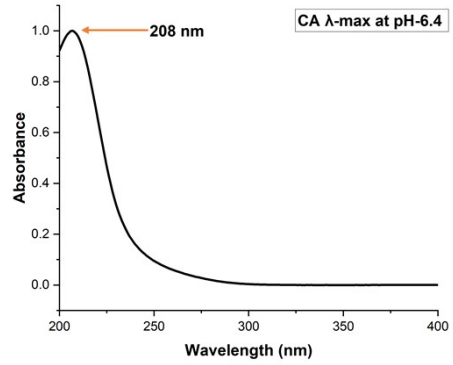

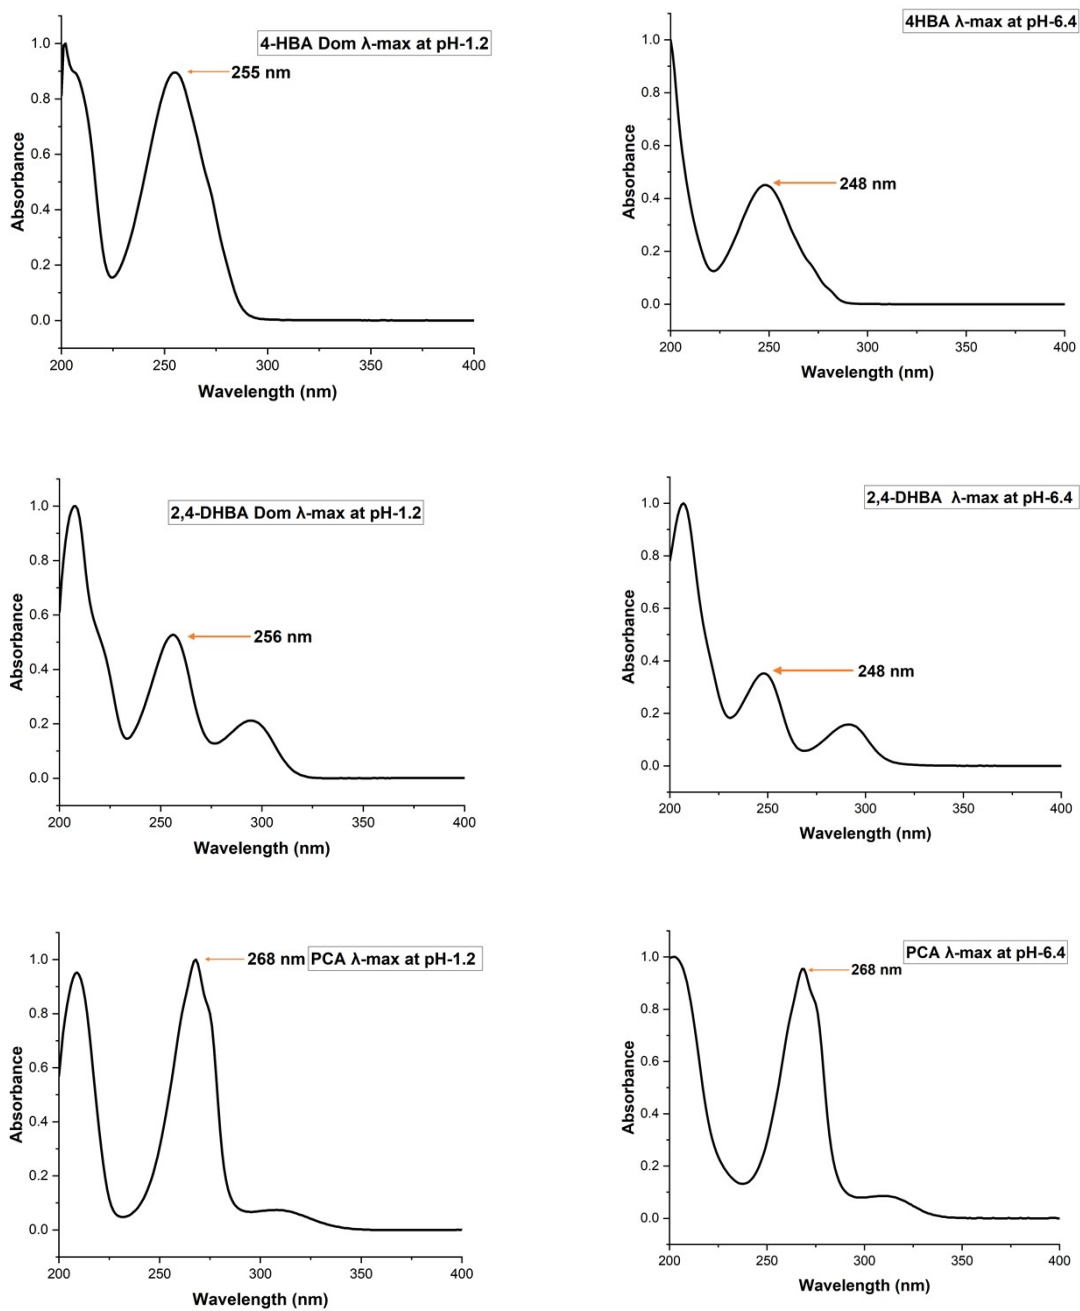

**Figure S4:** UV absorbance spectra of DOM and its molecular salts at various pH showed the negligible interference in the UV region of 284 nm, where the drug is absorbed.

Details of the solubility parameters of DOM molecular salts

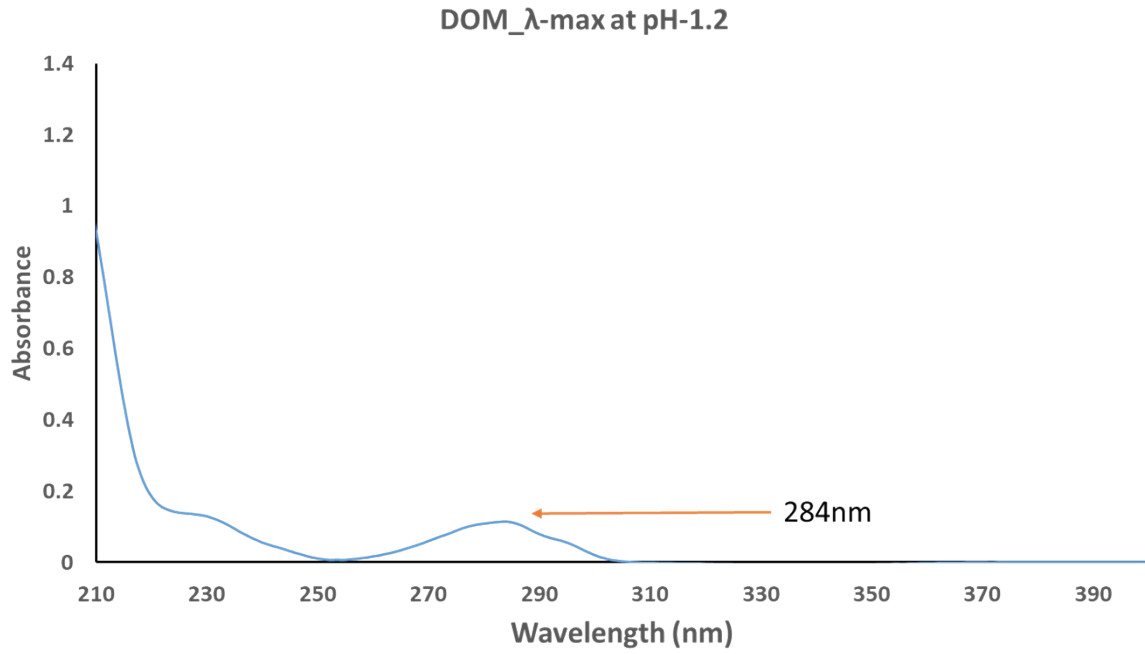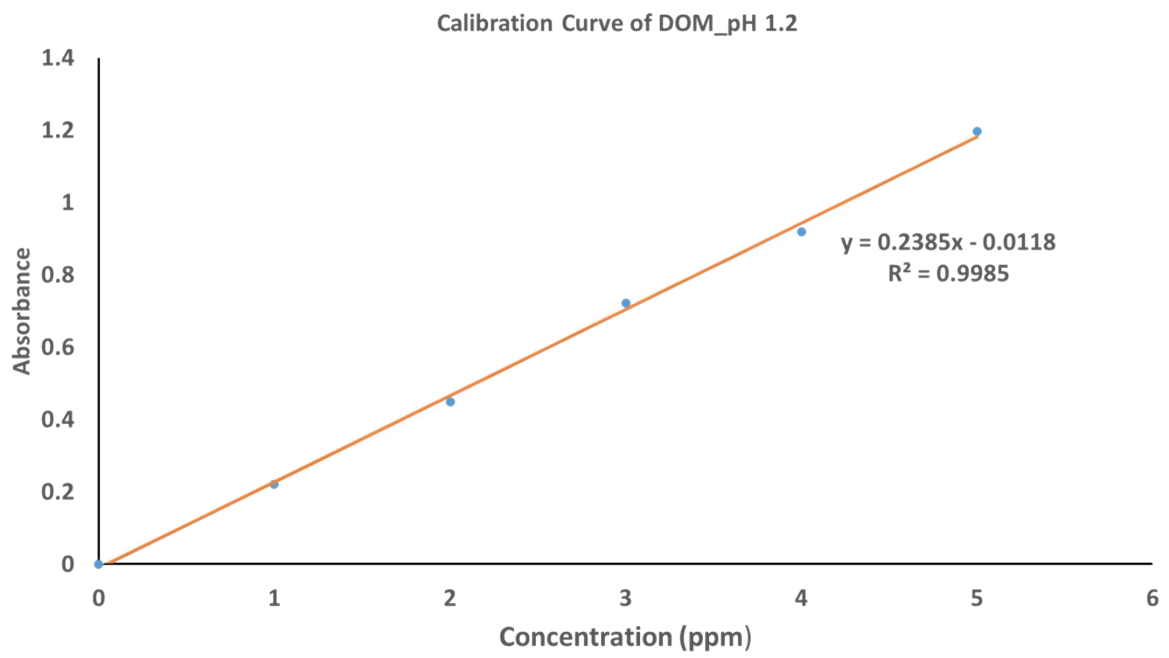

**Solubility of DOM in pH 1.2 after applying dilution factor**



| S.No | Sample Name  | Absorbance |       |       | Estimated Standard Deviation | After adding the dilution factor (mg/mL) |
|------|--------------|------------|-------|-------|------------------------------|------------------------------------------|
| 1    | DOM          | 0.281      | 0.284 | 0.285 | 0.002082                     | 1.100                                    |
| 2    | DOM.OA       | 0.428      | 0.433 | 0.427 | 0.003215                     | 1.6953                                   |
| 3    | DOM.AA       | 0.696      | 0.697 | 0.698 | 0.001                        | 2.7805                                   |
| 4    | DOM.SA       | 0.769      | 0.768 | 0.768 | 0.000577                     | 3.0761                                   |
| 5    | DOM.MA       | 0.565      | 0.566 | 0.568 | 0.001528                     | 2.2512                                   |
| 6    | DOM.FA       | 1.844      | 1.845 | 1.850 | 0.003215                     | 7.4291                                   |
| 7    | DOM.CA       | 0.394      | 0.396 | 0.392 | 0.002                        | 1.5576                                   |
| 8    | DOM.PCA      | 0.638      | 0.645 | 0.642 | 0.003512                     | 2.5456                                   |
| 9    | DOM.4-HBA    | 0.414      | 0.414 | 0.416 | 0.001155                     | 1.6386                                   |
| 10   | DOM.2,4-DHBA | 0.995      | 0.997 | 0.999 | 0.002                        | 3.9912                                   |
| 11   | DOM.MAL      | 0.354      | 0.357 | 0.360 | 0.003                        | 1.416                                    |

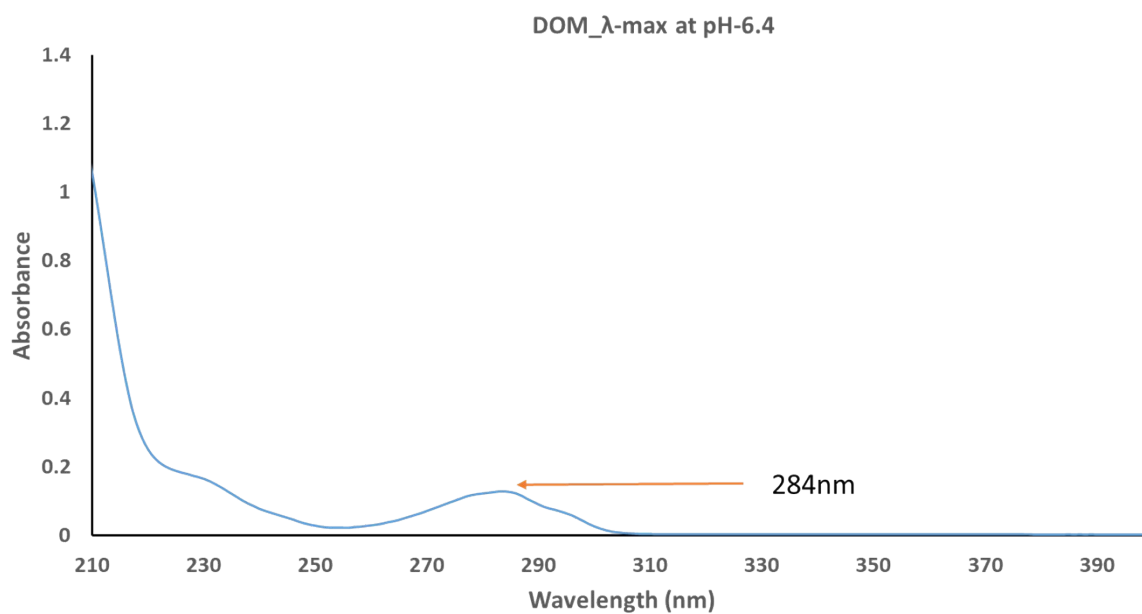

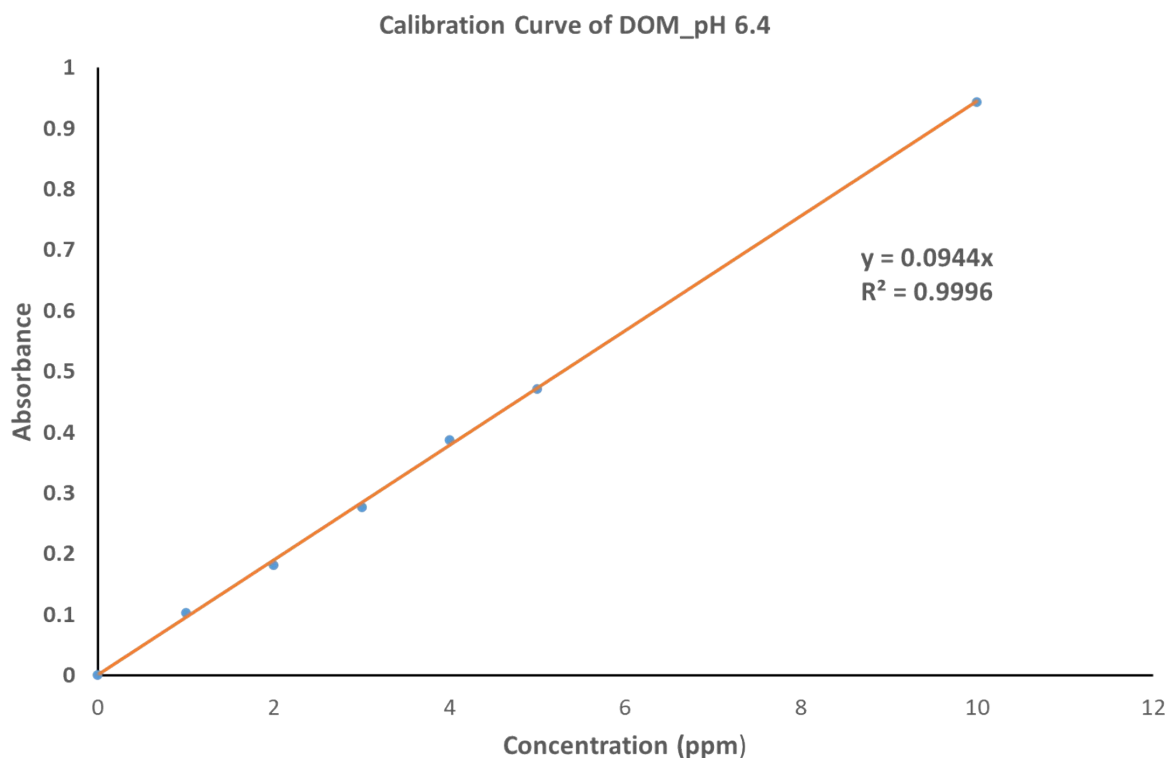

**Solubility of DOM in pH 6.4 after applying dilution factor**

| S.No | Sample Name  | Absorbance |        |        | Estimated Standard Deviation | After adding the dilution factor (mg/mL) |
|------|--------------|------------|--------|--------|------------------------------|------------------------------------------|
| 1    | DOM          | 0.243      | 0.244  | 0.246  | 0.001528                     | 1.3443                                   |
| 2    | DOM.OA       | 2.336      | 2.338  | 2.331  | 0.003606                     | 11.8008                                  |
| 3    | DOM.AA       | 3.4766     | 3.4760 | 3.4770 | 0.000503                     | 17.4992                                  |
| 4    | DOM.SA       | 3.25       | 3.23   | 3.24   | 0.01                         | 16.3671                                  |
| 5    | DOM.MA       | 2.75       | 2.76   | 2.78   | 0.015275                     | 13.8691                                  |
| 6    | DOM.FA       | 2.99       | 3      | 3.1    | 0.060828                     | 15.0681                                  |
| 7    | DOM.CA       | 0.451      | 0.451  | 0.452  | 0.000577                     | 2.3835                                   |
| 8    | DOM.PCA      | 0.647      | 0.648  | 0.650  | 0.001528                     | 3.3627                                   |
| 9    | DOM.4-HBA    | 0.171      | 0.173  | 0.170  | 0.001528                     | 0.9846                                   |
| 10   | DOM.2,4-DHBA | 0.104      | 0.107  | 0.103  | 0.002082                     | 0.6499                                   |
| 11   | DOM.MAL      | 0.292      | 0.296  | 0.294  | 0.002                        | 1.286                                    |

**Table S4:** A comparison of the solubility rate of synthesized molecular solids with respective salt former.

| Molecular Solid | Salt former solubility in water | Solubility media | Solubility rate (mg/mL) |
|-----------------|---------------------------------|------------------|-------------------------|
| DOM             | -                               | pH 1.2/pH 6.4    | 1.34/1.10               |
| DOM.OA          | 65.7                            |                  | 1.7/11.81               |
| DOM.MA          | 197                             |                  | 2.25/13.87              |
| DOM.SA          | 211                             |                  | 3.07/16.36              |
| DOM.FA          | 24.1                            |                  | 7.43/15.06              |
| DOM.AA          | 32.2                            |                  | 2.78/17.50              |
| DOM.CA          | 106                             |                  | 1.56/2.38               |
| DOM.4-HBA       | 11.9                            |                  | 1.64/0.98               |
| DOM.2,4-DHBA    | 5.78                            |                  | 3.99/0.64               |
| DOM.PCA         | 30.5                            |                  | 2.54/3.36               |

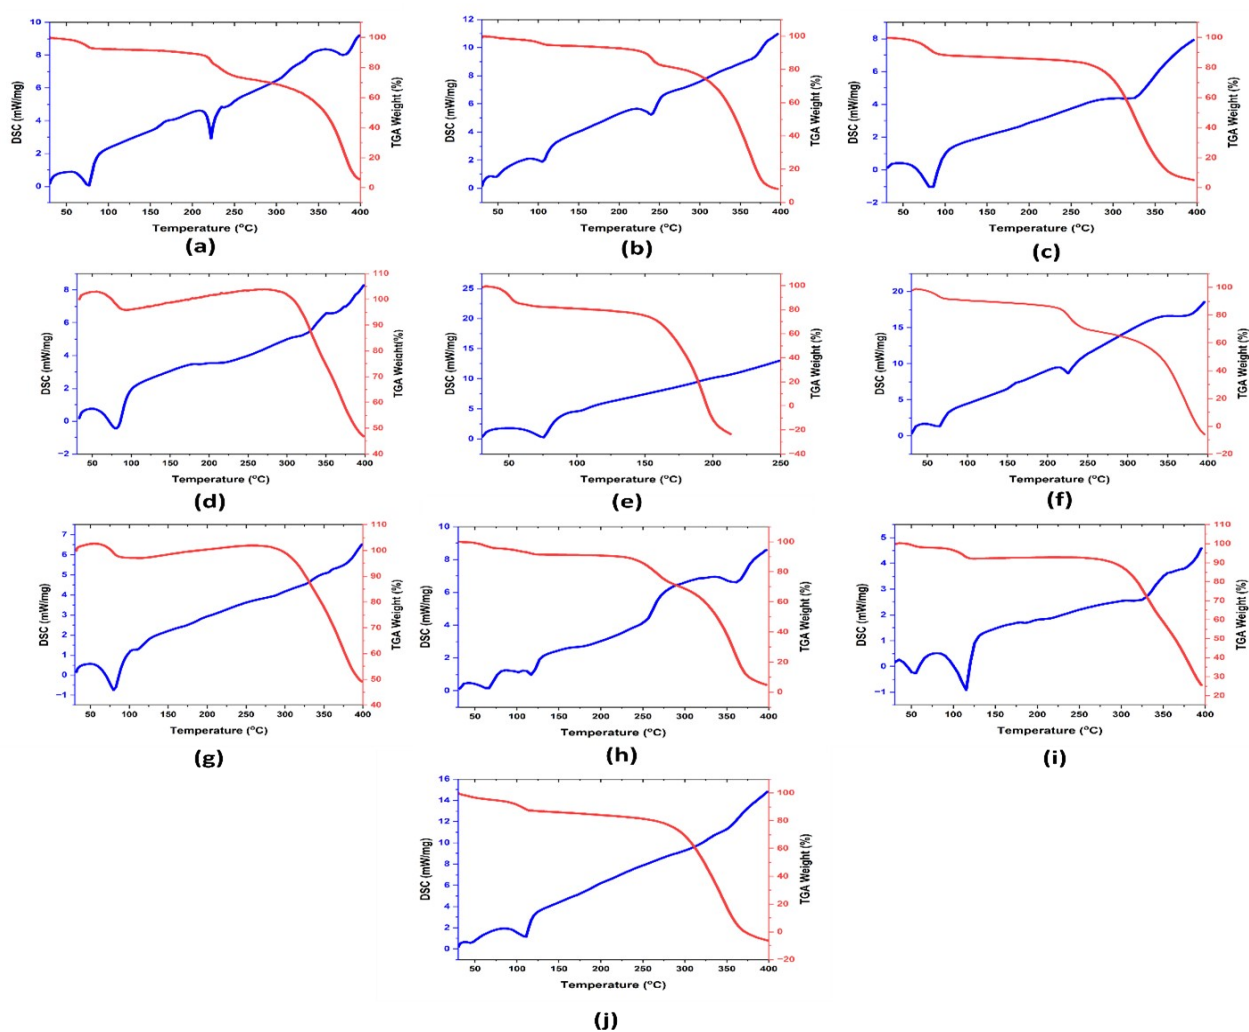

**Figure S5:** After solubility the thermogravimetric (TG) profile of (a) DOM.CA at pH 6.4 and (b) DOM.OA, (c) DOM.MA, (d) DOM.SA, (e) DOM.FA, (f) DOM.AA, (g) DOM.CA, (h) DOM.4-HBA, (i) DOM.2,4-DHBA and (j) DOM.PCA at pH 1.2.

## References:

- 1 K. Vyas, J. Moses Babu and G. Om Reddy, *Acta Crystallogr. Sect. C*, 1999, **55**, IUC9900104–IUC9900104.
